# Supplementary material for: Digital Trajectories to Care in First-Episode Psychosis
Source: Atypon-hosted journal article supplement (doi:10.1176/appi.ps.201800180), 2018-09-26
Supplement: appi.ps.201800180.ds001.pdf [file appi.ps.201800180.ds001.pdf]

 


Psychiatry Online
